# Supplementary material for: Photoenergy storage and power amplification strategy in membrane-less photoelectrochemical biofuel cells
Source: Royal Society of Chemistry journal article supplement (doi:10.1039/c6cc02267g), 2016-01-01
Supplement: c6cc02267g1.pdf [file c6cc02267g1.pdf]

## Supporting information

### Photoenergy Storage and Power Amplification Strategy in

### Membraneless Photoelectrochemical Biofuel Cells

You Yu <sup>†,‡</sup>, Miao Xu <sup>†,‡</sup>, Shaojun Dong <sup>†,‡,\*</sup>

<sup>†</sup> State Key Laboratory of Electroanalytical Chemistry, Changchun Institute of Applied Chemistry, Chinese Academy of Sciences, Changchun, Jilin, 130022;

<sup>‡</sup> University of Chinese Academy of Sciences, Beijing, 100049

*E-mail:* [dongsj@ciac.ac.cn](mailto:dongsj@ciac.ac.cn)

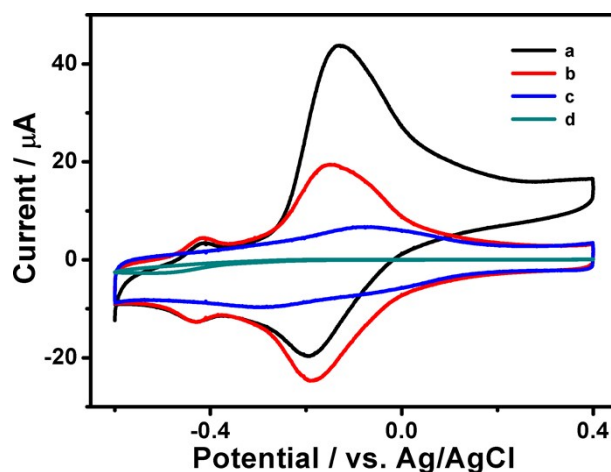

Figure S1 CV recorded at the MDB-MWNTs/GCE with (a) and without (b) NADH (5 mM), MWNTs/GCE (c) and bare GCE (d) in 0.1 M PBS, scan rate is 10 mV s<sup>-1</sup>.

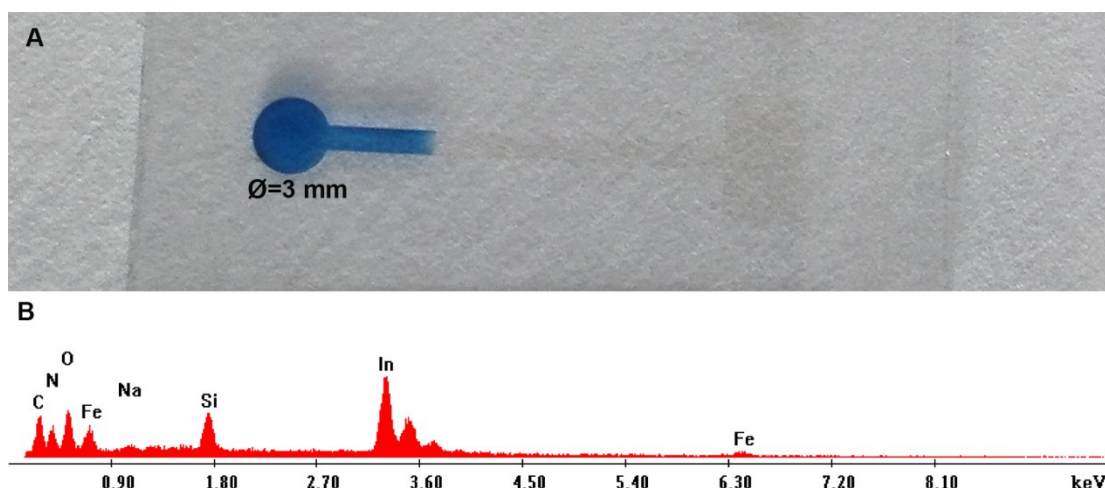

1  
2 Figure S2 (A) The photo of the patterned PB electrode. (B) Energy-dispersive X-ray  
3 image of the PB electrode.

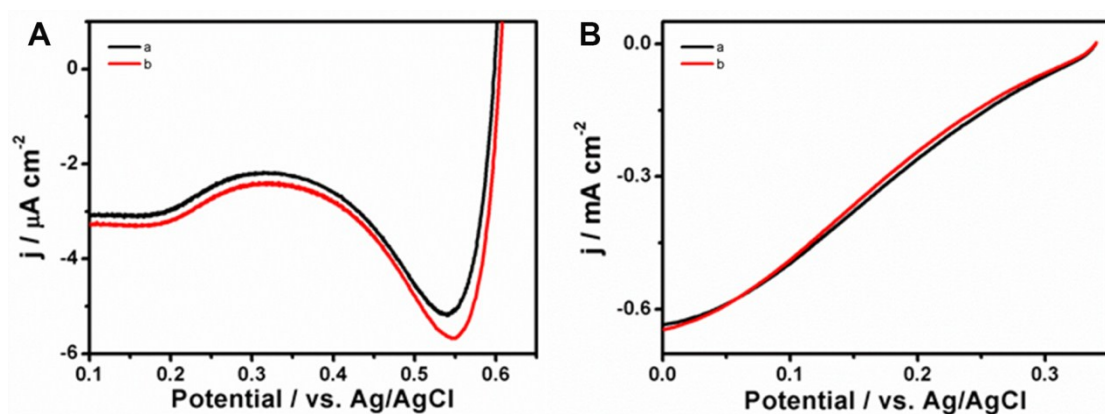

4  
5 Figure S3 (A) LSV recorded at the BiOI<sub>0.5</sub>Cl<sub>0.5</sub> in PBS (pH 6.0) under light  
6 illumination with (a) and without (b) 10 mM NAD<sup>+</sup> and 30 mM glucose; (B) LSV  
7 recorded at the PB in PBS (pH 6.0) with (a) and without (b) 10 mM NAD<sup>+</sup>, 30 mM  
8 glucose. Scan rate is 20 mV s<sup>-1</sup>.

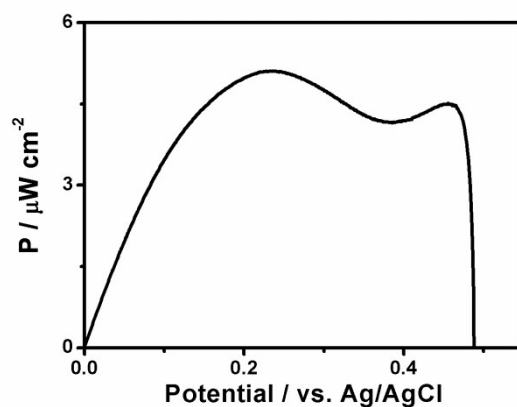

1

2 Figure S4. The power output of the PBFC assembled with PW and photoelectrode in  
 3 the PBS containing 10 mM NAD<sup>+</sup>, 30 mM glucose.

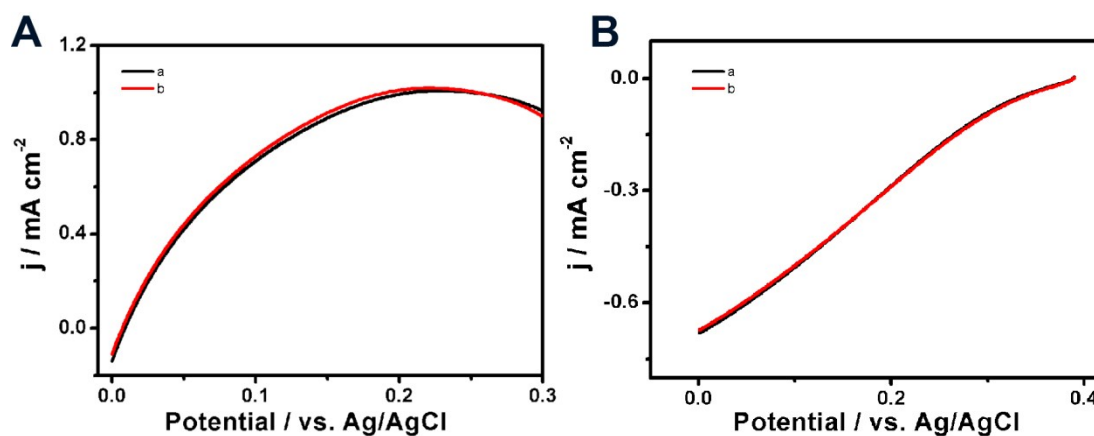

4

5 Figure S5 (A) LSV recorded at the PW in PBS (pH 6.0) under light illumination (a) or  
 6 in the dark (b); (B) LSV recorded at the PB in PBS (pH 6.0) under light illumination  
 7 (a) or in the dark (b). Scan rate is 20 mV s<sup>-1</sup>.

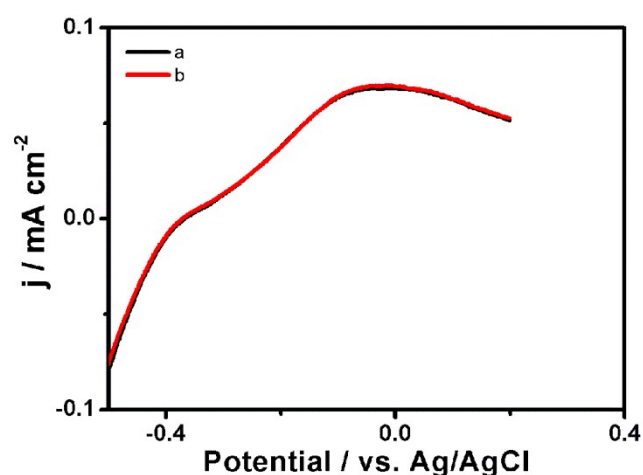

1  
2 Figure S6 LSV obtained at the CS/denatured GDH/MDB-MWNTs/GCE in PBS  
3 containing 10 mM NAD<sup>+</sup> without (a) and with (b) 30 mM glucose. The scan rate was  
4 20 mV s<sup>-1</sup>. The bioelectrode was immersed into 3 M guanidine hydrochloride  
5 overnight aimed at the denatured enzyme modified electrode.

6

**Table S1.** Comparison of different photoelectrochemical biofuel cell.

| Light sources | Anode                                                  | Cathode                                         | P <sub>max</sub><br>[cm <sup>-2</sup> ] | [μW | Reference<br>s |
|---------------|--------------------------------------------------------|-------------------------------------------------|-----------------------------------------|-----|----------------|
| Visible light | GDH/tetraarylporphyrin sensitizer S/SnO <sub>2</sub>   | Hg/Hg <sub>2</sub> SO <sub>4</sub>              | 19                                      |     | 1              |
| Visible light | GDH/porphyrin/TiO <sub>2</sub>                         | Hg/Hg <sub>2</sub> SO <sub>4</sub>              | 37                                      |     | 2              |
| Visible light | GDH/TCCP/TiO <sub>2</sub>                              | Pt black                                        | 33.94                                   |     | 3              |
| UV light      | GDH/H <sub>2</sub> -mesoporphyrin IX/TiO <sub>2</sub>  | Pt black                                        | 139                                     |     | 4              |
| UV light      | GDH/Zn-mesoporphyrin IX/TiO <sub>2</sub>               | Pt black                                        | 22                                      |     | 4              |
| Visible light | GOx <sup>[a]</sup> /TiO <sub>2</sub> /CdSe/carbonpaper | pt                                              | 40                                      |     | 5              |
| UV light      | TiO <sub>2</sub> nanotube array                        | BOD <sup>[b]</sup> /CNT-IL                      | 36                                      |     | 6              |
| Visible light | GOx/TTF-OMC <sup>[c]</sup>                             | Polyterthiophene                                | 23.65                                   |     | 7              |
| Visible light | GDH/MDB-MWNTs                                          | PB/PW and BiOI <sub>0.5</sub> Cl <sub>0.5</sub> | 160.3                                   |     | This work      |

1

## 2 **Experimental section**

### 3 *Chemicals*

4         $\text{K}_3[\text{Fe}(\text{CN})_6]$ ,  $\text{FeCl}_3$ ,  $\text{Bi}(\text{NO}_3)_3 \cdot 5\text{H}_2\text{O}$ ,  $\text{KI}$ ,  $\text{KCl}$ , and nitric acid ( $\text{HNO}_3$ ) were purchased from  
5 Beijing Chemical Works, P. R. China. P-Benzoquinone was obtained from Sinopharm Chemical  
6 Reagent Co., Ltd. (Beijing, China). Multi-walled carbon nanotubes (MWNTs) (80% purity,  
7 diameter 20-50 nm) were purchased from Shenzhen Nanotech. Port. Co. Ltd. (Shenzhen,  
8 China).  $\beta$ -D-(+)-glucose, chitosan (CS), Meldola's blue (MDB) and GDH (E.C. 1.1.1.47, initial  
9 activity of 235.3 U  $\text{mg}^{-1}$  from *Pseudomonas* sp.) were obtained from Sigma and used as received.  
10 Guanidine hydrochloride, NADH and  $\text{NAD}^+$  were purchased from the Gen-view Scientific Inc. A  
11 0.10 M phosphate buffer solution (PBS, pH = 6.0) was employed as the supporting electrolyte for  
12 the best cyclic properties of PB/PW[9]. All other chemicals were of analytical grade and all  
13 aqueous solutions were prepared with ultrapure water ( $>18.25 \text{ M}\Omega \text{ cm}$ ) obtained from Millipore  
14 system.

15        Glassy carbon electrode (GCE, 2.6 mm in diameter, Tokai Carbon Co., Japan) was polished  
16 sequentially with 1.0 and 0.3  $\mu\text{m}$  alumina slurry and washed ultrasonically in water and ethanol  
17 for several minutes, respectively. MWNTs were treated by well-established methods with slight  
18 modification, MWNTs were dispersed in 30%  $\text{HNO}_3$  and then refluxed for 24 h at 140  $^\circ\text{C}$  to  
19 acquire carboxylic group functionalized MWNTs. 10  $\mu\text{L}$  of MWNTs suspension (2  $\text{mg mL}^{-1}$ ) was  
20 spread onto a GCE to dry, then the electrode was immersed into 0.5 mM Meldola's blue (MDB)  
21 for 30 min to achieved MDB-MWNTs/GCE. 5  $\mu\text{L}$  GDH (1  $\text{mg mL}^{-1}$ ) was coated on the MDB-  
22 MWNTs/GCE, which was dried at 4  $^\circ\text{C}$  overnight and achieved GDH/MDB-MWNTs/GCE. After

1 that, 10  $\mu$ L of 1% chitosan solution was spread onto the electrode surface to form a film (noted as  
2 CS/GDH/MDB-MWNTs/GCE).

3 Indium tin oxide (ITO) (surface resistance of 30-60  $\Omega$  cm<sup>-2</sup>, Nanbo Display Technology Co.,  
4 Ltd.) was used as the working electrode. Prior to electrodeposition, the ITO was washed with  
5 acetone, ethanol and water in ultrasonic bath sequentially. The plating solutions were prepared as  
6 following: 0.338 g Bi(NO<sub>3</sub>)<sub>3</sub>·5H<sub>2</sub>O was dissolved in 0.4 M KI and 0.4 M KCl aqueous solution.  
7 Then 100  $\mu$ L 4 M HNO<sub>3</sub> and 8 mL 50 mM p-benzoquinone were added to the above solution,  
8 respectively. The depositions were performed potentiostatically at -0.1 V at room temperature for  
9 20 min. The patterned ITO electrodes (10.5 mm<sup>2</sup>) were electropolymerized with PB in a freshly  
10 prepared solution containing 0.1 M KCl, 0.1 M HCl, 2.5 mM K<sub>3</sub>[Fe(CN)<sub>6</sub>] and 2.5 mM FeCl<sub>3</sub> by  
11 applying a constant potential of 0.4 V for 480 s. The successful preparation of the PB film was  
12 confirmed by its obvious color and absorbance change. The modified electrodes were thoroughly  
13 rinsed with water to remove the physically adsorbed species, and then dried at 100 °C overnight.

14 The PBFC was assembled by placing the as prepared bioelectrode, PB film electrode and  
15 photoelectrode into 8 ml PBS (pH=6.0) containing 5 mM NAD<sup>+</sup> and 30 mM glucose. The Xe  
16 lamp was set facing to the photocathode in order that the light could illuminate the whole  
17 electrode surface, the PB electrode was set at right angles with the photoelectrode avoiding from  
18 the luminous.

19 The X-ray diffraction (XRD) measurements were performed on a D8 Focus diffractometer  
20 (Bruker) with Cu K $\alpha$  radiation ( $\lambda$  = 0.15405 nm) in the range of 10-80° (2 $\theta$ ). Scanning electron  
21 microscopy (SEM) measurements were made on a XL30 ESEM with an accelerating voltage of 10  
22 kV to determine the morphology of products. The light source was a 300 W Xenon lamp (PLS-

1 SXE 300, Beijing Trusttech Co. Ltd., China) with a UV-cut filter ( $\lambda \geq 400$  nm). Cyclic  
2 voltammetry (CV), open circuit potential-time, chronoamperometry and linear sweep voltammetry  
3 (LSV) experiments were performed with an electrochemical analyzer (CHI 832C, Shanghai,  
4 China). The polarization curves were achieved by the LSV measurement at scan rate  $1 \text{ mV s}^{-1}$ . A  
5 three-electrode system was used including a working electrode, a platinum flat as the counter  
6 electrode and the Ag/AgCl (saturated KCl) as the reference electrode, respectively. The operation  
7 of the biofuel cell was performed at  $37^\circ\text{C}$ , other experiments were carried out at room  
8 temperature ( $22^\circ\text{C}$ ).

## 9 Notes and references

- 10 1. L. de la Garza, G. Jeong, T. A. Moore, A. L. Moore, D. Gust, *J. Phys. Chem. B* 2003, **107**, 10252-  
11 10260.
- 12 2. A. Brune, G. Jeong, T. A. Moore, A. L. Moore, D. Gust, *Langmuir* 2004, **20**, 8366-8371.
- 13 3. K. Wang, J. Yang, W. Xing, C. Liu, *Biosens. Bioelectron.* 2012, **32**, 177-182.
- 14 4. J. Yang, L. Feng, C. Liu, W. Xing, K. Wang, *J. Power Sources* 2013, **222**, 344-350.
- 15 5. J. Zhang, Y. Su, Y. Zhu, J. Yun, X. Yang, *New J. Chem.* 2014, **38**, 2300-2304.
- 16 6. L. Han, L. Bai, C. Zhu, Y. Wang, S. Dong, *Chem. Commun.* 2012, **48**, 6103-6105.
- 17 7. L. Zhang, Z. Xu, B. Lou, L. Han, X. Zhang, S. Dong, *ChemSusChem* 2014, **7**, 2427-2431.
